# Supplementary material
Source: PubMed Central journal article supplement (PMC3647989)

### a IFN- $\gamma$ secretion by splenocytes

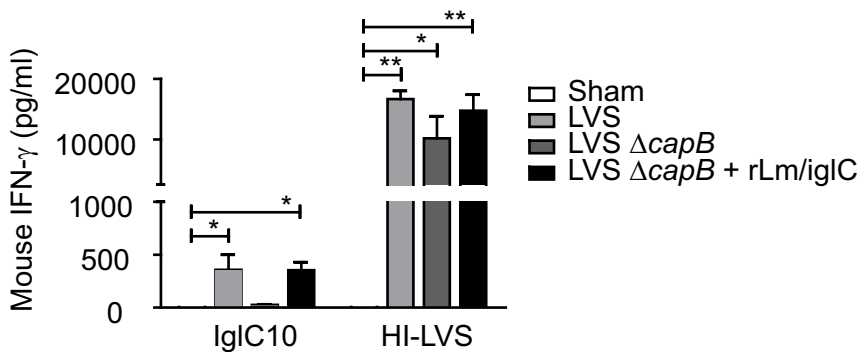

### b IL-17A secretion by splenocytes

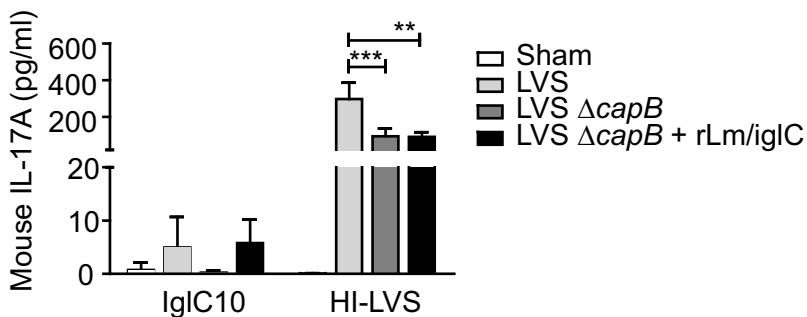

### c Serum Antibody to HI-LVS

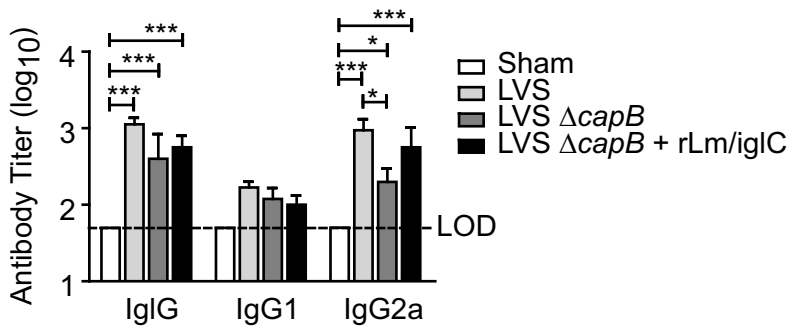

Supplement: IAI.01013-12_zii999090103so2.pdf [file IAI.01013-12_zii999090103so2.pdf]
